# Supplementary material
Source: PubMed Central journal article supplement (PMC1976361)

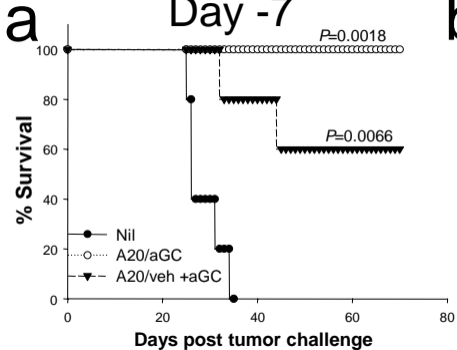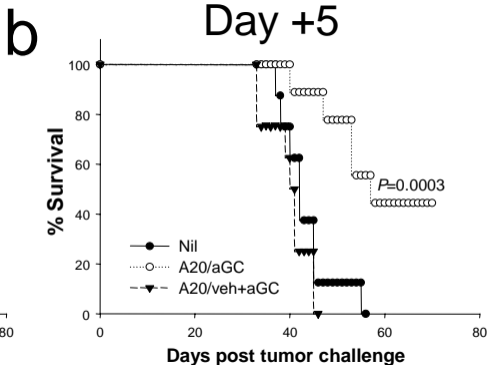

Supplement: blood_blood-2006-12-061309_1.pdf [file blood_blood-2006-12-061309_1.pdf]

**a**

24 hr

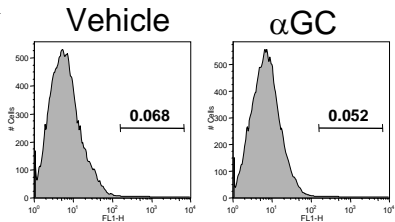

48 hr

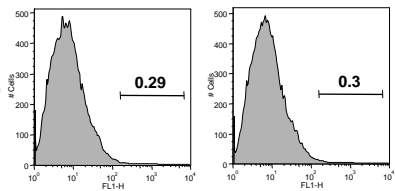

Annexin V

**b**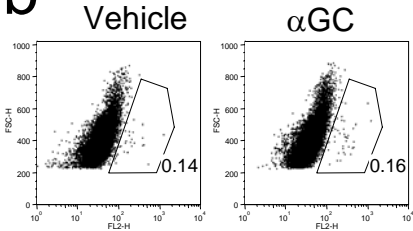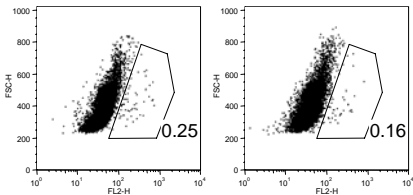

Active Caspase-3

**c**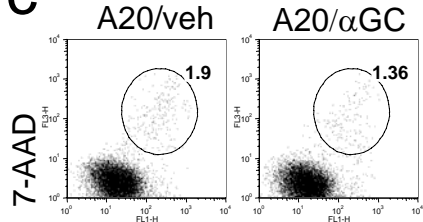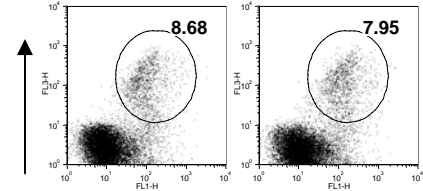

Annexin V

Supplement: blood_blood-2006-12-061309_2.pdf [file blood_blood-2006-12-061309_2.pdf]
